# Supplementary material for: Secreted Phospholipases A2 from Animal Venoms in Pain and Analgesia
Source: PubMed Central journal article supplement (PMC5744126; doi:10.3390/toxins9120406), 2017-12-19
Supplement: toxins-09-00406-s001.pdf [file toxins-09-00406-s001.pdf]

# Supplementary Materials: Secreted Phospholipases A<sub>2</sub> from Animal Venoms in Pain and Analgesia

Vanessa O. Zambelli, Gisele Picolo, Carlos A. H. Fernandes, Marcos R. M. Fontes and Yara Cury

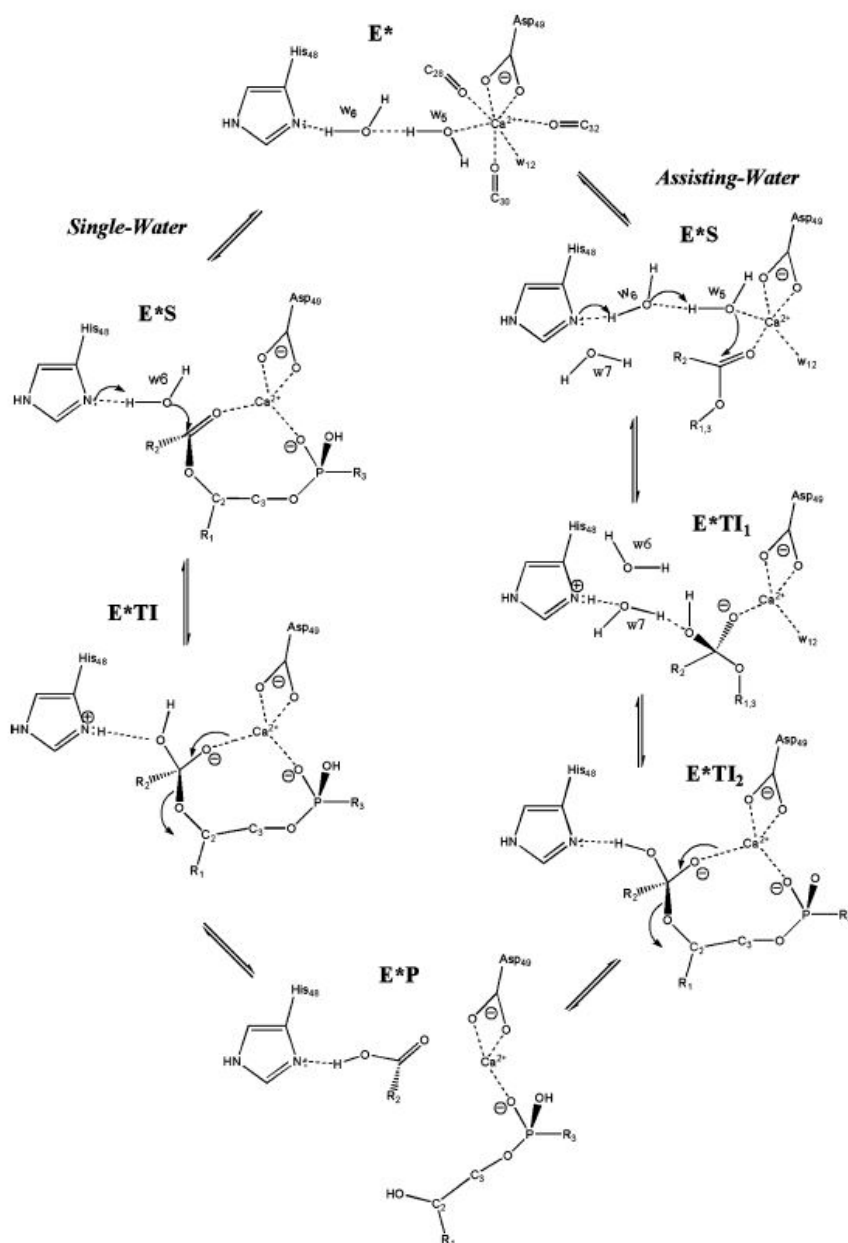

**Figure S1:** Two proposed catalytic mechanism for secreted PLA<sub>2</sub>s—the single-water and assisting-water mechanisms. "Original figure from Bahnsen, 2005: Archives of Biochemistry and Biophysics, volume 433, pages 96–106, Elsevier, copyright 2005 [1]

## Reference

- 1 Bahnsen, B. J. Structure, function and interfacial allostereism in phospholipase A<sub>2</sub>: Insight from the anion-assisted dimer. *Arch. Biochem. Biophys.* 2005, 433, 96–106.
